# Supplementary material
Source: publisher site journal article supplement (https://www.dovepress.com/article/244149)
Supplement: Supplementary file 1 [file get_supplementary_file.php]

#
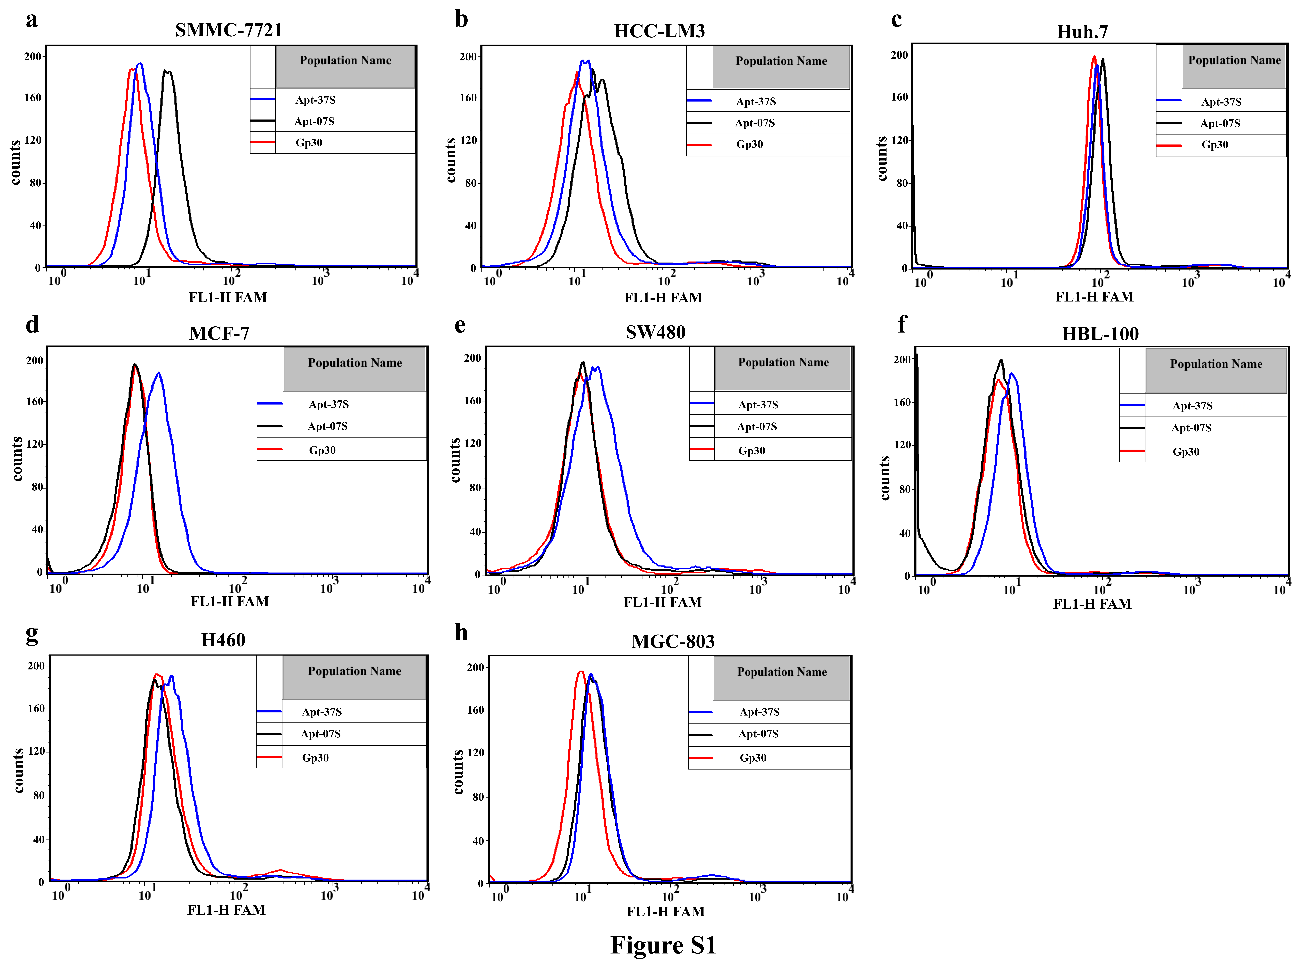


# Figure S1. The cell binding abilities of aptamer Apt-07S and Apt-37S to different kinds of cells.

FAM labeled Gp30 was used as a control. The cell binding ability of aptamer Apt-07S and Apt-37S to HepG2 and L02 had been shown in Fig 2, and the two aptamers were stained with eight other kinds of cells respectively, which were shown in Table 2.
